# Supplementary material for: 3D ZnO/Activated Carbon Alginate Beads for the Removal of Antibiotic-Resistant Bacteria and Antibiotic Resistance Genes
Source: MDPI journal article supplement (doi:10.3390/polym15092215), 2023-05-07
Supplement: s1 [file s1]

**Table S1. The standard curves of qPCR**

| Gene                      | Standard curve          | R <sup>2</sup> | Amplification efficiency/% |
|---------------------------|-------------------------|----------------|----------------------------|
| <i>tetA</i>               | $y = -3.0876x + 39.05$  | 0.9985         | 110                        |
| <i>bla</i> <sub>TEM</sub> | $y = -3.1115x + 38.626$ | 0.9904         | 109                        |
| <i>aph</i> (3')-Id        | $y = -3.2168x + 39.788$ | 0.9938         | 105                        |
| 16S rRNA                  | $y = -3.1678x + 45.778$ | 0.9947         | 107                        |

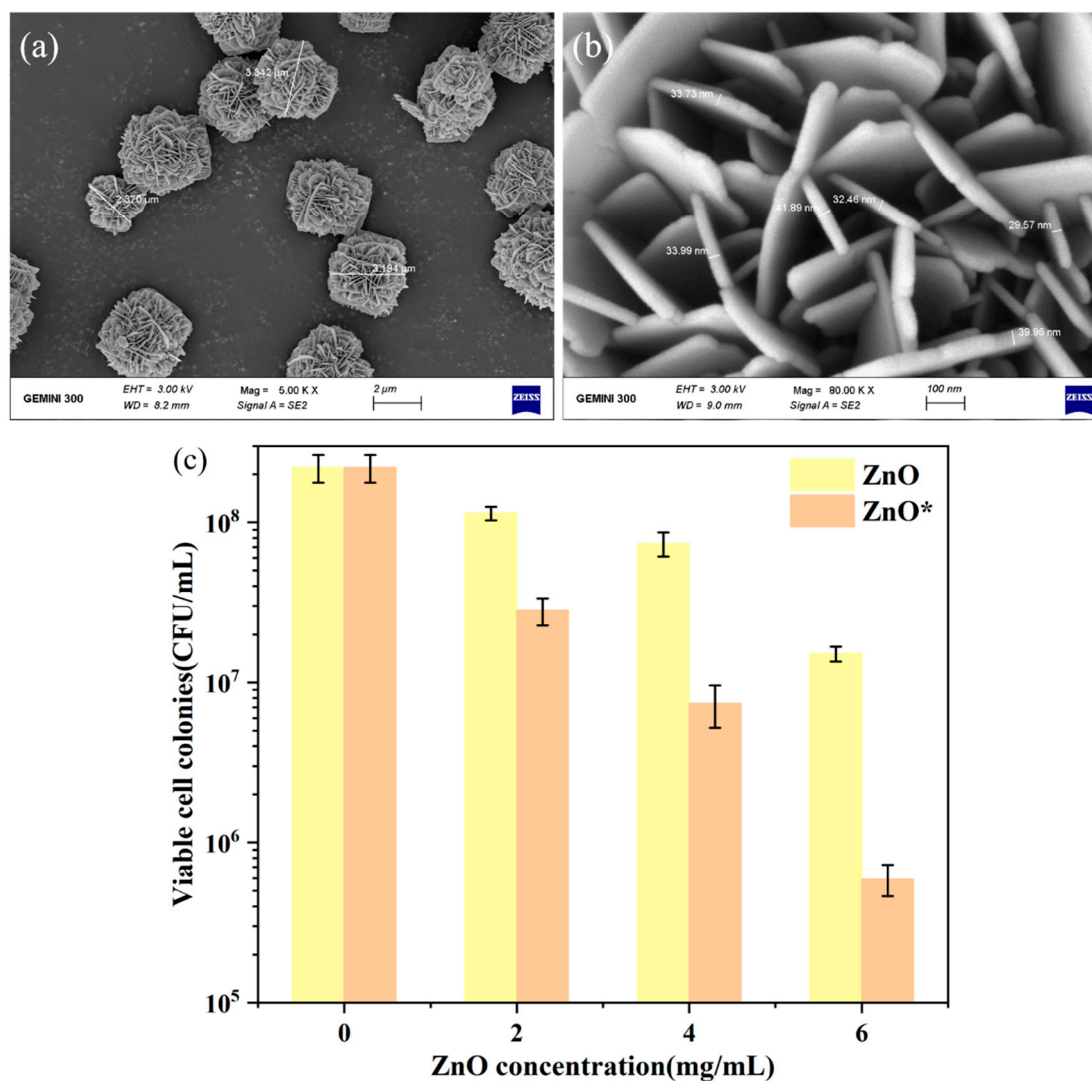

**Figure S1.** (a) SEM image and (b) enlarged view of the as-prepared hierarchical ZnO nanoflowers.

(c) The antibacterial property of synthesized ZnO (ZnO\* = ZnO nanoflowers).

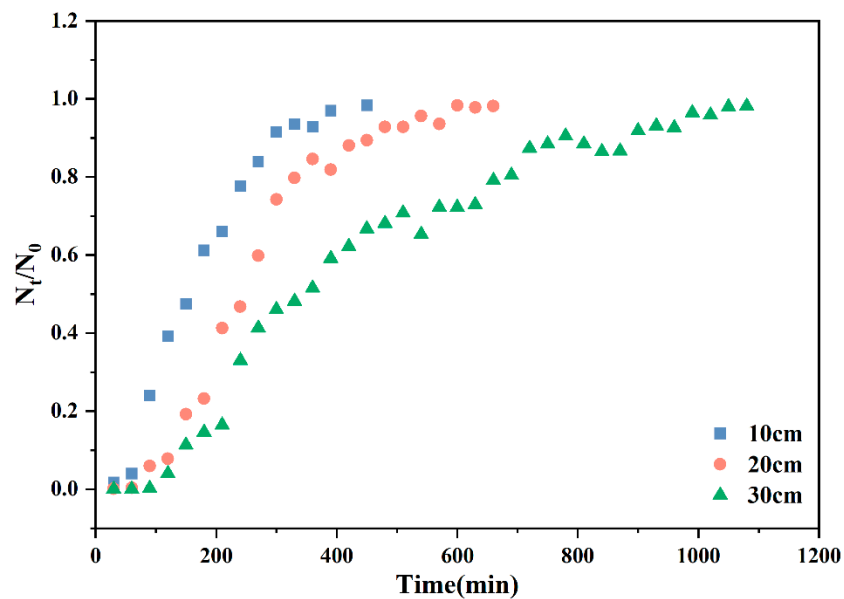

**Figure S2.** Breakthrough curves of the composite beads during ARB removal at different bed depth (Initial bacterial concentration = 106 CFU/mL; flow rate = 1 mL/min);

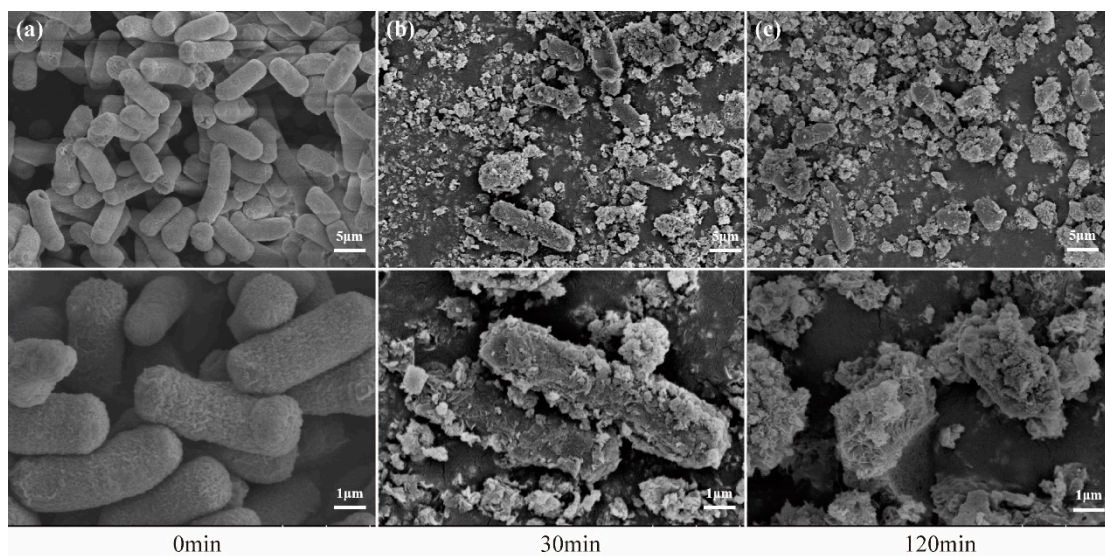

**Figure S3.** SEM images of *E.coli* HB101 after treatment for different time. (a) 0min, (b) 30min and (c) 120min.
